# Supplementary material for: One step generation of customizable gRNA vectors for multiplex CRISPR approaches through string assembly gRNA cloning (STAgR)
Source: PubMed Central journal article supplement (PMC5922533; doi:10.1371/journal.pone.0196015), 2018-04-27
Supplement: pone.0196015.s003.pdf [file pone.0196015.s003.pdf]

# STAGR- String assembly gRNA cloning

This protocol is for one- step generation of gRNA plasmids with 2-8 expression cassettes.

## 1. STAGR primer design:

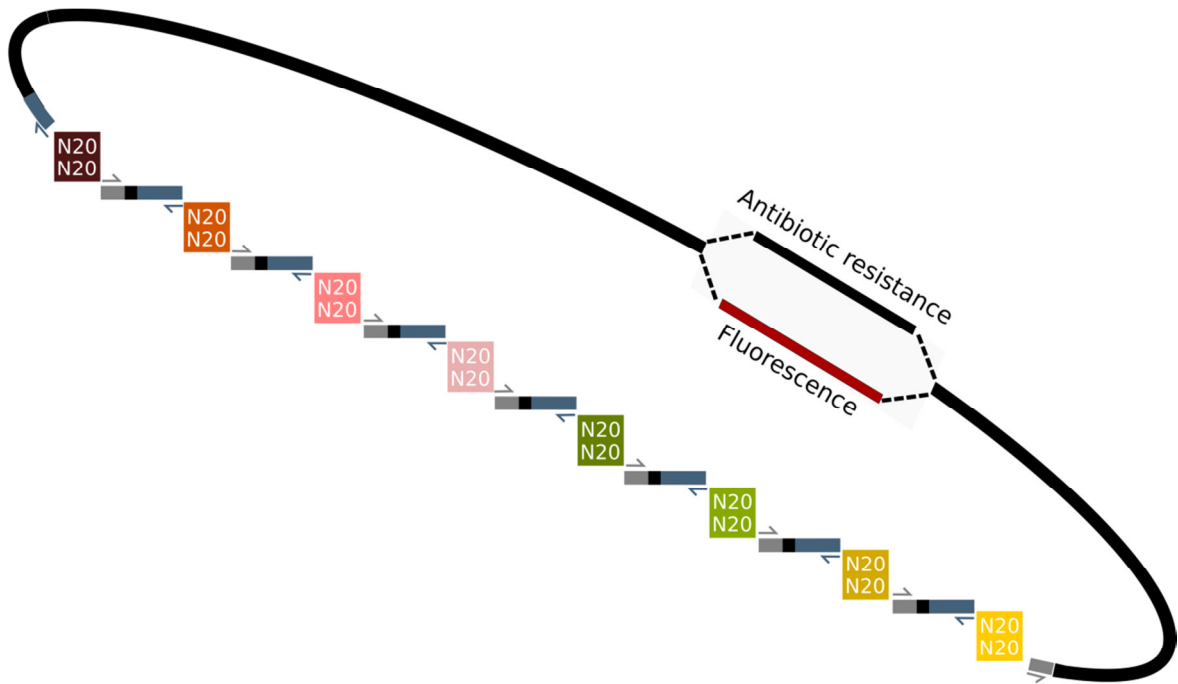

Fig.P1 Scheme of a 6xSTAGR assembly

1. Decide how many gRNA cassettes should be included in one vector, and which promoters and gRNA scaffolds should be used for each of the gRNAs. Design your gRNAs by using your preferred tool (e.g. [www.benchling.com](http://www.benchling.com)).
2. The gRNA sequences are added to the primers for amplification of the STAgR DNA string as overhangs. Sense gRNA sequences are added to the forward primer (which binds to the scaffold/SAM part of the respective STAgR string). The antisense gRNA sequence is added in front of the reverse primer sequences of the specific promoters.

Tab.P1 : Primer Sequences for gRNA scaffolds and promoters.

|                                      |                            |
|--------------------------------------|----------------------------|
| Forward primer for String and Vector |                            |
| scaffold_fwd                         | GTTTTAGAGCTAGAAATAGCAAGTT  |
| SAM_fwd                              | GTTTTAGAGCTAGGCCAACATGAGG  |
| Reverse primer for String and Vector |                            |
| hU6_rev                              | CGGTGTTTCGTCCTTT           |
| mU6_rev                              | CAAACAAGGCTTTTCTCCAAGG     |
| hH1_rev                              | CTGGGAAAGAGTGGTCTCATAACAGA |
| h7SK_rev                             | CCGAGGTACCCAAGCGG          |

The sense gRNA sequence (Fig. P1, green) of the last gRNA and the antisense of the first gRNA (Fig. S1brown) respectively are added to the PCR primers used for amplification of the STAgR vector backbone. The remainder of the primers are used for amplification from the string, thereby attaching the sense and antisense gRNAs so as to use them as overhangs for assembly in the desired order. The first string piece is amplified with a forward primer using the first gRNA (Fig. P1 brown) as an overhang and a reverse primer using the next gRNA in the sequence in the antisense direction (Fig. P1 dark red) as an overhang. The next STAgR pieces are amplified with a forward primer (using the dark red protospacer in Fig. P1) as an overhang and a reverse primer (using the light red protospacer, Fig. P1) as an overhang and so on.

## 2. PCR amplification

This step generates the Gibson fragments for assembly into the vector backbone. The choice of STAgR DNA string template defines the promoter and gRNA scaffold for each gRNA in the assembled vector.

Set up every string and vector reaction as follows:

- 10 µl Phusion HF buffer
- 1 µl 10mM dNTPs
- 0,25 µl Primer (100 µM)
- 10 ng DNA template
- 0,5 µl Phusion Polymerase
- 1,5 µl DMSO
- Add H2O to 50µl

98°C 1.30min

---

98°C 10sec

59°C 30sec (for gRNA Scaffold) 68°C 30sec (for SAM loop)

72°C 30sec (inserts) / 1.30 min (vector) x38

---

72°C 10min

4°C ∞

To incorporate the gRNA scaffold, use “STAgR\_Neo” as a template for the vector PCR, if the SAM Scaffold is the desired gRNA scaffold use “pcSAM\_helper”. Analyze the amplified fragments on a 1% agarose gel (Fig. P2). Digest the vector reaction with DpnI as follows:

44,5 µl PCR reaction

5 µl 10x Cutsmart Buffer

0,5 µl DpnI (10 units, NEB)

Incubate at 37°C, 30min – 1h

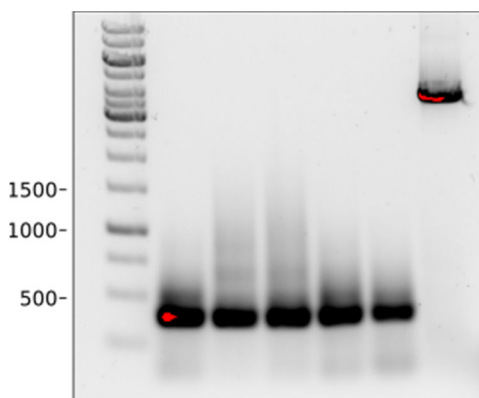

Fig. P2: STAgR PCR of different string fragment (lanes 1-5) and a circular amplification of a vector (lane 6)

1.4 Clean up STAgR pieces with AMPure XP Beads or any column-based reaction clean-up kit.

1.5 Determine DNA concentrations

### 3. Gibson Assembly Reaction

This step assembles the pieces previously generated by PCR into a vector with multiple gRNA expression cassettes in a single step.

All amplified gRNA expression cassettes are used in equimolar amounts.

3.1 Set up the following reactions on ice (include a no insert control):

Tab. P2 : Composition of STAgR Reaction

|                                  | 2x STAgR          | 3-8x STAgR          |
|----------------------------------|-------------------|---------------------|
| Recommended DNA Ratio            | vector:insert 1:1 | vector:insert = 1:3 |
| Total Amount of DNA              | 0.03–0.2 pmol     | 0.2–0.5 pmol        |
| Gibson Assembly MasterMix (1,5x) | 7,5 µl            | 7,5 µl              |
| Total Volume                     | 10 µl*            | 10µl*               |

\*Total volume can be increased to 20 µl. The amount of Gibson Assembly Master Mix then has to be doubled as well.

3.2 Incubate samples in a thermocycler at 50°C for 45 to 60 minutes. Store samples on ice or at –20°C for subsequent transformation.

3.3 Directly transform half of the mix into chemically competent bacteria. Do not forget two plasmid controls, one where you directly transform the same amount of vector you put into the Gibson reaction and one actual Gibson reaction only with the vector and without any inserts.

3.4. After recovery, plate the transformed bacteria onto agar plates containing Ampicillin (100µg/ml) and incubate overnight at 37°C.

#### 4. Colony PCR

The aim of this step is to identify bacterial colonies that harbour plasmids with the correct number of assembled gRNAs. The primers used bind outside the gRNA expression cassettes and the size of the amplicon thus corresponds to the number of gRNA expression cassettes in the vector.

StAgR\_seq\_fwd2: ACTGGATCCGGTACCAAGG

StAgR\_seq\_rev: TTACGGTTCCTGGCCTTTTG

4.1 Analyze at least 24 bacterial colonies. For each PCR reaction, pre-aliquot the appropriate number of vials with 100 µl LB medium with Ampicillin (100µg/ml).

4.2 Set up a PCR master mix (10 µl per reaction):

For 10 reactions:

10 µl Taq buffer

2µl 10mM dNTPs

0,5 µl Primer (100mM)

0,5 µl Taq Polymerase

→ Add H<sub>2</sub>O to 100µl

4.2 Aliquot the PCR master mix into microcentrifuge tubes

4.3. Using a sterile pipette tip, pick a colony from the agar plate and insert the tip into one aliquot of the PCR master mix. Swirl the tip around gently to ensure some of the bacteria are transferred to the master mix, before transferring the tip to the corresponding aliquot of LB medium, to be cultured at 37°C for later use.

4.4. Run the PCR reactions using the following program:

PCR Programm Colony PCR:

94°C 5min

---

94°C 30sec

55°C 30sec

72°C 2min                    x38

---

72°C 10min

4°C ∞

Primer:

StAgR\_seq\_fwd2: ACTGGATCCGGTACCAAGG

StAgR\_seq\_rev: TTACGGTTCCTGGCCTTTTG

4.5 Analyze the PCR amplicons on a 1% agarose gel.

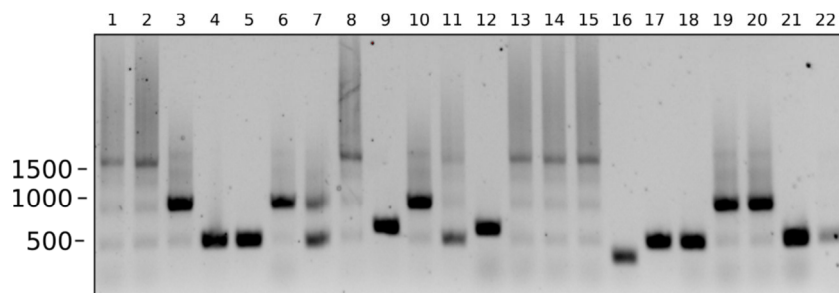

Fig. P3: Colony PCR of a 4xSTAgR reaction using hU6 promoters and canonical gRNA scaffold. 24 bacterial colonies were analyzed, of which 6 showed the estimated band of a 4x STAgR cassette (1596 bp). Vectors with two gRNA expression cassettes yield a 823 bp amplicon, a band at 458 bp corresponds to a single gRNA cassette being present in the vector.

Amplicon sizes vary according the promoter and gRNA Stem loop used.

Tab. P3 Sizes of promoters and scaffolds

|                         |       |
|-------------------------|-------|
| hU6                     | 265bp |
| hH1                     | 225bp |
| mU6                     | 316bp |
| H7SK                    | 245bp |
| gRNA scaffold           | 83bp  |
| SAMloop + gRNA scaffold | 143bp |

4.4 From the results of the colony PCR identify the cultures harbouring the correct vectors and inoculate a 2,5ml overnight LB culture (with 100µg/ml ampicillin). Incubate for 12h at 37°C

4.5 Extract plasmid DNA.

4.6 Sequence the plasmids using the following primers. StAgR\_seq\_fwd1 (GAGTTAGGGCGGGACTATG), StAgR\_seq\_fwd2 (ACTGGATCCGGTACCAAGG) and StAgR\_seq\_rev (TTACGGTTCCTGGCCTTTTG)

## Appendix

Forward primer for String and Vector:

|              |                                                |
|--------------|------------------------------------------------|
| scaffold_fwd | NNNNNNNNNNNNNNNNNNNNNGTTTTAGAGCTAGAAATAGCAAGTT |
| SAM_fwd      | NNNNNNNNNNNNNNNNNNNNNGTTTTAGAGCTAGGCCAACATGAGG |

Reverse primer for Sting and Vector:

|          |                                                 |
|----------|-------------------------------------------------|
| hU6_rev  | NNNNNNNNNNNNNNNNNNNNNCGGTGTTTCGTCCTTT           |
| mU6_rev  | NNNNNNNNNNNNNNNNNNNNNCAAACAAGGCTTTTCTCCAAGG     |
| hH1_rev  | NNNNNNNNNNNNNNNNNNNNNCTGGGAAAGAGTGGTCTCATA CAGA |
| h7SK_rev | NNNNNNNNNNNNNNNNNNNNNCCGAGGTACCCAAGCGG          |

gRNA Scaffold

GTTTTAGAGCTAGAAATAGCAAGTTAAATAAGGCTAGTCCGTTATCAACTTGAAAAAGTGGCACCGAGTCGG  
TGCTTTTTTT

SAM loop

GTTTTAGAGCTAGGCCAACATGAGGATCACCCATGTCTGCAGGGCCTAGCAAGTTAAATAAGGCTAGTCCGT  
TATCAACTTGGCCAACATGAGGATCACCCATGTCTGCAGGGCCAAGTGGCACCGAGTCGGTGCTTTTTTT

h7SK

CTGCAGTATTTAGCATGCCCCACCCATCTGCAAGGCATTCTGGATAGTGTCAAACAGCCGGAATCAAGTCC  
GTTTATCTCAAACTTAGCATTTTGGGAATAAATGATATTTGCTATGCTGGTTAAATTAGATTTTAGTTAAATTT  
CTGCTGAAGCTCTAGTACGATAAGCAACTTGACCTAAGTGTAAGTTGAGACTTCCTTCAGGTTTATATAGCTT  
GTGCGCCGCTTGGGTACCTCGG

GGCTCCATGGGTTCCGCCGCTGTTTCGATATATTTGGACTTCCTTCAGAGTTGAAATGTGAATCCAGTTCAACGA  
ATAGCATGATCTCGAAGTCGTCCTTTAAATTGATTTTAGATTAATTTGGTCGTATCGTTTATAGTAAATAAGGGT  
TTTACGATTTCAAACCTATTTGCCTGAACTAAAGGCCGACAAAACCTGTGATAGGTCTTACGGAACGTCTACCC  
ACCCCGTACGATTTATGACGTC

hU6

AAGGTCGGGCAGGAAGAGGGCCTATTTCCCATGATTCCTTCATATTTGCATATACGATACAAGGCTGTTAGAG  
AGATAATTAGAATTAATTTGACTGTAAACACAAAGATATTAGTACAAAATACGTGACGTAGAAAGTAATAATTT  
CTTGGGTAGTTTGCAGTTTTAAATTTATGTTTTAAATGGACTATCATATGCTTACCGTAACTTGAAAGTATTT  
GATTTCTGGCTTTATATATCTTGTGGAAAGGACGAAACACCG



GCCACAAAGCAGGAAAGGTGTTCTATATATTTTCGGTCTTTAGCTTTATGAAAGTTCAATGCCATTCGTATACTA  
TCAGGTAAAATTTTGTATTAATAATTTTGACGTTTGATGGGTTCTTTAATAATGAAAGATGCAGTGCATAAAACA  
TGATTATAGAAACACAAATGTCAGTTAATTAAGATTAATAGAGAGATTGTCGGAACATAGCATATACGTTTAT  
ACTTCTTAGTACCCTTTATCCGGGAGAAGGACGGGCTGGAA

hH1

GAACGCTGACGTCATCAACCCGCTCCAAGGAATCGCGGGCCCAGTGCTACTAGGCGGGAACACCCAGCGCGC  
GTGCGCCCTGGCAGGAAGATGGCTGTGAGGGACAGGGGAGTGGCGCCCTGCAATATTTGCATGTCGCTATGT  
GTTCTGGGAAATCACCATAAACGTGAAATGTCTTTGGATTTGGGAATCTTATAAGTTCTGTATGAGACCACTCT  
TTCCAG

GACCCTTCTCACCAGAGTATGTCTTGAATATTCTAAGGGTTTAGGTTTCTGTAAAGTGCAAATACCACTAAAG  
GGTCTTGTGTATCGCTGTACGTTTATAACGTCCCGCGGTGAGGGGACAGGGAGTGTGCGGTAGAAGGACGGTC  
CCGCGTGCAGCGACCCACAAGGGCGGATCACTGTGACCCGGGCGCTAAGGAACCTCGCCCACTACTGCAG  
TCGCAAG

mU6

GATCCGACGCCGCCATCTCTAGGCCCGCGCCGGCCCCCTCGCACAGACTTGTGGGAGAAGCTCGGCTACTCCC  
CTGCCCCGGTTAATTTGCATATAATATTTCTAGTAAGTATAGAGGCTTAATGTGCGATAAAAGACAGATAATC  
TGTTCTTTTAAACTAGCTACATTTTACATGATAGGCTTGGATTTCTATAAGAGATACAAATACTAAATTATTAT  
TTAAAAAACAGCACAAAAGGAAACTCACCTAACTGTAAAGTAATTGTGTGTTTTGAGACTATAAATATCCCT  
TGGAGAAAAGCCTTGTGTTG

GTTTGTCCGAAAAGAGGTTCCCTATAAATATCAGAGTTTTGTGTGTTAATGAAATGTCAATCCCACTCAAAGG  
AAAACACGACAAAAAATTTTATTATAAATCATAAACATAGAGAATATCTTTAGGTTTCGGATAGTACATTTTAC  
ATCGATCATAATTTTTCTGTCTAATAGACAGAAAATAGCGTGTAAATTCGGAGATATCAATGATCCTTTATAATA  
TACGTTAATTGGCCCCGTCCCCTCATCGGCTCGAAGAGGGTGTTCAGACACGCTCCCCCGCGCCGCGCCGGA  
TCTTACCGCCGAGCCTAG

ML3636\_gRNA

TTATCCGGTAACTATCGTCTTGAGTCCAACCCGGTAAGACACGACTTATCGCCACTGGCAGCAGCCACTGGTAA  
CAGGATTAGCAGAGCGAGGTATGTAGGCGGTGCTACAGAGTTCTTGAAGTGGTGGCCTAACTACGGCTACAC  
TAGAAGAACAGTATTTGGTATCTGCGCTCTGCTGAAGCCAGTTACCTTCGGAAAAAGAGTTGGTAGCTCTTGA  
TCCGGCAAACAAACCACCGCTGGTAGCGGTGGTTTTTTTTGTTTGAAGCAGCAGATTACGCGCAGAAAAAAG  
GATCTCAAGAAGATCCTTTGATCTTTTCTACGGGGTCTGACGCTCAGTGGAACGAAAACCTCACGTTAAGGGATT  
TTGGTCATGAGATTATCAAAAAGGATCTTCACCTAGATCCTTTTAAATTAATAAATGAAGTTTTAAATCAATCTAA  
AGTATATATGAGTAACTTGGTCTGACAGTTACCAATGCTTAATCAGTGAGGCACCTATCTCAGCGATCTGTCT  
ATTTTCGTTTCATCCATAGTTGCCTGACTCCCCGTCGTGTAGATAACTACGATACGGGAGGGCTTACCATCTGGCC  
CCAGTGCTGCAATGATACCGCGAGACCCACGCTCACCGGCTCCAGATTTATCAGCAATAAACCAGCCAGCCGG  
AAGGGCCGAGCGCAGAAGTGGTCTGCAACTTTATCCGCCTCCATCCAGTCTATTAATTGTTGCCGGGAAGCT  
AGAGTAAGTAGTTCGCCAGTTAATAGTTTGCGCAACGTTGTTGCCATTGCTACAGGCATCGTGGTGTACAGCTC  
GTCGTTTGGTATGGCTTCATTGAGCTCCGGTCCCAACGATCAAGGCGAGTTACATGATCCCCATGTTGTGCA  
AAAAAGCGGTTAGCTCCTTCGGTCTCCGATCGTTGTCAGAAGTAAGTTGGCCGAGTGTATCACTCATGGTT  
ATGGCAGCACTGCATAATTCTTACTGTCATGCCATCCGTAAGATGCTTTTCTGTGACTGGTGTGACTCAACC  
AAGTCATTCTGAGAATAGTGTATGCGGCGACCGAGTTGCTCTTGGCCGCGTCAATACGGGATAAATACCGCGC  
CACATAGCAGAACTTTAAAAGTGCTCATCATTGGAAAACGTTCTTCGGGGCGAAAACCTCAAGGATCTTACCG  
CTGTTGAGATCCAGTTCGATGTAACCCACTCGTGCACCCAAGTATCTTACGATCTTTTACTTTTACCAGCGTT  
TCTGGGTGAGCAAAAACAGGAAGGCAAAATGCCGCAAAAAGGGGAATAAGGGCGACACGGAAATGTTGAAT

ACTCATACTCTTCCTTTTTCAATATTATTGAAGCATTTATCAGGGTTATTGTCTCATGAGCGGATACATATTTGAA  
TGTATTTAGAAAAATAAACAAATAGGGGTTCCGCGCACATTTCCCCGAAAAGTGCCACCTGACGTGATAAGA  
TACATTGATGAGTTTGGACAAACCACAAGTAGAATGCAGTGAAAAAATGCTTTATTTGTGAAATTTGTGATGC  
TATTGCTTTATTTGTAACCATTATAAGCTGCAATAAACAAGTTGGGGTGGGCGAAGAACTCCAGCATGAGATCC  
CCGCGCTGGAGGATCATCCAGCCGGCGTCCCGAAAACGATTCCGAAGCCCAACCTTTCATAGAAGGCGGCG  
GTGGAATCGAAATCTCGTGATGGCAGGTTGGGCGTGCCTTGGTCGGTCATTTCGAACCCAGAGTCCCGTCA  
GAAGAACTCGTCAAGAAGGCGATAGAAGGCGATGCGCTGCGAATCGGGAGCGGCGATACCGTAAAGCACGA  
GGAAGCGGTGAGCCCATTCGCCGCAAGCTCTTCAGCAATATCACGGGTAGCCAACGCTATGTCCTGATAGCG  
GTCCGCCACACCCAGCCGGCCACAGTCGATGAATCCAGAAAAGCGGCCATTTTCCACCATGATATTCGGCAAG  
CAGGCATCGCCATGGGTACGACGAGATCCTCGCCGTCGGGCATGCGCGCCTTGAGCCTGGCGAACAGTTTCG  
GCTGGCGGAGCCCTGATGCTCTTCGTCAGATCATCTGATCGACAAGACCGGCTTCCATCCGAGTACGTGC  
TCGCTCGATGCGATGTTTCGCTTGGTGGTGAATGGGCAGGTAGCCGGATCAAGCGTATGCAGCCGCCGATT  
GCATCAGCCATGATGGATACTTCTCGGCAGGAGCAAGGTGAGATGACAGGAGATCCTGCCCGGCACTTCGC  
CCAATAGCAGCCAGTCCCTTCCCGCTTCAGTGACAACGTCGAGCACAGCTGCGCAAGGAACGCCCGTCGTGGC  
CAGCCACGATAGCCGCGCTGCCTCGTCCTGCAGTTCATTCAGGGCACCGGACAGGTCGGTCTTGACAAAAGA  
ACCGGGCGCCCTGCGCTGACAGCCGGAACACGGCGGCATCAGAGCAGCCGATTGTCTGTTGTGCCAGTCA  
TAGCCGAATAGCCTCTCCACCCAAGCGGCCGGAGAACCTGCGTGCAATCCATCTTGTTCAATCATGCGAAACG  
ATCCTCATCTGTCTCTTGATCAGATCCGAAAATGGATATACAAGCTCCCGGGAGCTTTTTGCAAAGCCTAGG  
CCTCCAAAAGCCTCCTCACTACTTCTGGAATAGCTCAGAGGCAGAGGCGGCCTCGGCCTCTGCATAAATAA  
AAAAAATTAGTCAGCCATGGGGCGGAGAATGGGCGGAACTGGGCGGAGTTAGGGGCGGGATGGGCGGAGT  
TAGGGGCGGGACTATGGTTGCTGACTAATTGAGATGCATGCTTGCATACTTCTGCCTGCTGGGGAGCCTGGG  
GACTTTCCACACCTGGTTGCTGACTAATTGAGATGCACTGTACAAAAAAGCAGGCTTTAAAGGAACCAATTCA  
GTCGACTGGATCCGGTACCAAGGTCGGGCAGGAAGAGGGCCTATTTCCCATGATTCCTTCATATTTGCATATAC  
GATACAAGGCTGTTAGAGAGATAATTAGAATTAATTTGACTGTAAACACAAAGATATTAGTACAAAATACGTG  
ACGTAGAAAAGTAATAATTTCTTGGGTAGTTTGCAGTTTTAAAATTATGTTTTAAAATGGACTATCATATGCTTAC  
CGTAACTTGAAAGTATTTGATTTCTTGGCTTTATATATCTTGTGGAAAGGACGAAACACCGGTTTTAGAGCTA  
GAAATAGCAAGTAAAATAAGGCTAGTCCGTTATCAACTTGAAAAAGTGGCACCGAGTCGGTGCTTTTTTTAA  
GCTTGGGCCGCTCGAGGTACCTCTCTACATATGACATGTGAGCAAAAAGGCCAGCAAAAAGGCCAGGAACCGTA  
AAAAGGCCGCTTGGTGGCGTTTTTCCATAGGCTCCGCCCCCTGACGAGCATCACAAAATCGACGCTCAAG  
TCAGAGGTGGCGAAACCCGACAGGACTATAAGATACCAGGCGTTTTCCCCTGGAAGCTCCCTCGTGCCTCT  
CCTGTTCCGACCCTGCCGTTACCGGATACCTGTCCGCTTTCTCCCTTCGGGAAGCGTGGCGCTTTTCATAGC  
TCACGCTGTAGGTATCTCAGTTCGGTGTAGGTGTTGCTCCAAGCTGGGCTGTGTGCACGAACCCCCGTTCA  
GCCCCACCGCTGCGCC
